# Supplementary material for: Controlling interfacial interactions of supramolecular assemblies by light-responsive overcrowded alkenes
Source: Royal Society of Chemistry journal article supplement (doi:10.1039/c9cc05023j), 2019-01-01
Supplement: c9cc05023j1.pdf [file c9cc05023j1.pdf]

# Supporting information

## Controlling interfacial interaction of supramolecular assemblies by light-responsive overcrowded alkene

Zhao-Tao Shi, Jing-Jing Yu, Qi Zhang, Ming-Ming Li, Wen-Jing Liang, Cai-Xin  
Zhao, Da-Hui Qu \*

|     |                                                                                                               |    |
|-----|---------------------------------------------------------------------------------------------------------------|----|
| 1.  | Experiments Section.....                                                                                      | 1  |
| 1.1 | General Methods and Details .....                                                                             | 1  |
| 1.2 | Synthesis of target monomer <i>trans</i> - <b>8</b> .....                                                     | 2  |
|     | Synthesis of compound <b>2</b> .....                                                                          | 2  |
|     | Synthesis of compound <b>3</b> .....                                                                          | 3  |
|     | Synthesis of compound <b>5</b> .....                                                                          | 3  |
|     | Synthesis of compound <b>7</b> .....                                                                          | 4  |
|     | Synthesis of compound <i>trans</i> - <b>8</b> .....                                                           | 4  |
| 1.3 | Synthesis of the reference compound <i>cis</i> - <b>8</b> .....                                               | 5  |
| 2.  | Structural characterization of <i>trans</i> - <b>8</b> .....                                                  | 7  |
| 2.1 | <sup>1</sup> H- <sup>1</sup> H COSY spectrum of <i>trans</i> - <b>8</b> before adding DBU .....               | 7  |
| 2.2 | <sup>1</sup> H- <sup>1</sup> H COSY spectrum of <i>trans</i> - <b>8</b> after adding DBU .....                | 7  |
| 3.  | Photo- and thermal-isomerization behaviors of <i>trans</i> - <b>8</b> in dichloromethane-d <sub>2</sub> ..... | 8  |
| 4.  | UV-vis absorption spectra and DLS data of <i>trans</i> - <b>8</b> .....                                       | 9  |
| 5.  | SEM images of <i>trans</i> - <b>8</b> before and after UV irradiation in acetone .....                        | 10 |
| 6.  | TEM images of <i>trans</i> - <b>8</b> before and after UV irradiation in acetone .....                        | 10 |
| 7.  | Solubility of <i>trans</i> - <b>8</b> in different solvents .....                                             | 11 |
| 8.  | TEM and SEM images of <i>cis</i> - <b>8</b> before and after UV irradiation in tetrahydrofuran.....           | 11 |
| 9.  | pH-responsive behavior of <i>trans</i> - <b>8</b> .....                                                       | 12 |
| 10. | References .....                                                                                              | 12 |
| 11. | Appendix .....                                                                                                | 13 |

# 1. Experiments Section

## 1.1 General Methods and Details

Chemicals were purchased from Acros, Aldrich, TCI, Adamas, or Merck and used as received unless otherwise stated. Solvents were reagent grade, which were dried and distilled prior to use according to standard procedures. All reactions were carried out under an atmosphere of dry argon unless otherwise stated.  $^1\text{H}$  NMR,  $^{13}\text{C}$  NMR,  $^1\text{H}$ - $^1\text{H}$  COSY spectra were measured on a Bruker AV-400 and AV-600 spectrometer. The electronic spray ionization (ESI) mass spectra were tested on a LCT Premier XE mass spectrometer. UV-Vis absorption spectra were recorded on Varian Cary 100 spectrometer (1 cm, quartz cells). The UV light resource were obtained on a Perfect Light PL-LED 100. DLS were measured on MALV RN, ZETA SIZER, Model ZEN3600, 303K. SEM images were recorded on a 500-300000/GeminiSEM 500 apparatus. TEM images were recorded on a JEOL JEM-1400 apparatus, and the samples were prepared by casting dilute solution on copper sheet.

## 1.2 Synthesis of target monomer *trans*-8

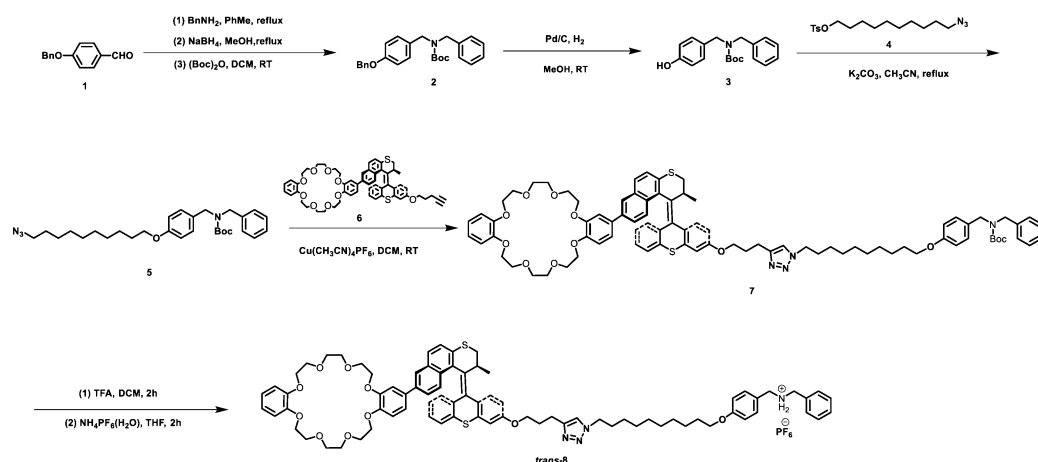

**Scheme S1.** Synthetic route of *trans*-8

Compound **1**, Compound **4** and compound **6** were synthesized according to previous reports<sup>1-3</sup>.

### Synthesis of compound **2**

A mixture of compound **1** (2.50 g, 11.79 mmol) and benzylamine (1.26 g, 11.79 mmol) in dry toluene (70 mL) was heated under reflux for 12 hours. The reaction mixture was cooled to room temperature and the solvent was removed under vacuum. The residue was dissolved in MeOH (45 mL), NaBH<sub>4</sub> (0.89 g, 23.53 mmol) was added under ice bath, and the mixture was stirred for 4 h. The solvent was evaporated under reduced pressure and the crude residue was partitioned between CH<sub>2</sub>Cl<sub>2</sub> and 2 N NaOH solution. The aqueous layer was further extracted with CH<sub>2</sub>Cl<sub>2</sub> and the organic layer was dried over anhydrous sodium sulfate. The obtained oil was stirred together with (Boc)<sub>2</sub>O (3.85 g, 17.68 mmol) in dry CH<sub>2</sub>Cl<sub>2</sub> for 5 h at room temperature. The solvent was evaporated under reduced pressure and the crude residue was purified by column chromatography (SiO<sub>2</sub>, PE/EA = 5/1) to afford compound **2** (3.60g, 76%) as a white oil. <sup>1</sup>H NMR (400 MHz, CDCl<sub>3</sub>, 298K)  $\delta$  (ppm): 7.38-7.45 (m, 4H), 7.35 (d, *J* = 1.6 Hz, 1H), 7.32 (d, *J* = 7.6 Hz, 2H), 7.07-7.29 (m, 5H), 6.94 (d, *J* = 8.8 Hz, 2H), 5.07 (s, 2H), 4.27-4.40 (m, 4H), 1.50 (s, 9H). <sup>13</sup>C NMR (CDCl<sub>3</sub>, 100 MHz, 298 K)  $\delta$  (ppm): 158.21, 156.11, 137.15, 130.48, 129.51, 128.98, 128.71, 128.62, 128.09, 127.59, 127.29, 114.99,

80.12, 70.18, 49.20, 48.52, 28.60. HR-MS (ESI) (m/z): [M + Na]<sup>+</sup> calcd for C<sub>26</sub>H<sub>29</sub>NO<sub>3</sub>, 426.2045, found 426.2043.

### Synthesis of compound 3

A mixture of compound **2** (0.80 g, 2.0 mmol) and Pd/C (5%) (cat) in MeOH (30 mL) was stirred under H<sub>2</sub> (130 mL/min) atmosphere for 4 h. The resulting mixture was filtered over celite to remove Pd/C, and evaporated under reduced pressure to afford compound **3** (0.58 g, 93%) as a white oil. <sup>1</sup>H NMR (400 MHz, DMSO, 298 K) δ (ppm): 9.35 (s, 1H), 7.20-7.35 (m, 5H), 7.03 (d, *J* = 8.0 Hz, 2H), 6.72 (d, *J* = 8.0 Hz, 2H), 4.10-4.30 (m, 4H), 1.39 (s, 9H). <sup>13</sup>C NMR (DMSO, 100 MHz, 298 K) δ (ppm): 156.54, 155.06, 128.90, 128.43, 128.11, 127.32, 127.02, 79.09, 48.60, 28.04. HR-MS (ESI) (m/z): [M + Na]<sup>+</sup> calcd for C<sub>19</sub>H<sub>23</sub>NO<sub>3</sub>, 336.1576, found 336.1563.

### Synthesis of compound 5

To a solution of compound **3** (300 mg, 0.96 mmol) in CH<sub>3</sub>CN was added compound **4** (338 mg, 0.96 mmol) and potassium carbonate (397 mg, 2.87 mmol). The mixture was refluxed under argon atmosphere for 10 h, and the solvent was removed under vacuum. The residue was extracted with CH<sub>2</sub>Cl<sub>2</sub> (3 × 50 mL) and washed with brine (50 mL), water (50 mL), then the organic layer was dried over anhydrous sodium sulfate and concentrated in vacuo to give the crude product, which was purified by column chromatography (SiO<sub>2</sub>, PE/EA = 10/1) to afford compound **5** (408 mg, 86%) as a white oil. <sup>1</sup>H NMR (400 MHz, CDCl<sub>3</sub>, 298 K) δ (ppm): 7.04-7.34 (m, 7H), 6.85 (d, *J* = 8.8 Hz, 2H), 4.26-4.39 (m, 4H), 3.94 (t, *J* = 13.2 Hz, 2H), 3.26 (t, *J* = 14.0 Hz, 2H), 1.74-1.81 (m, 2H), 1.56-1.62 (m, 2H), 1.50 (s, 9H), 1.32 (s, 12H). <sup>13</sup>C NMR (CDCl<sub>3</sub>, 100 MHz, 298 K) δ (ppm): 158.55, 156.13, 129.93, 129.50, 128.95, 128.62, 128.08, 127.54, 127.28, 114.60, 80.11, 68.14, 51.61, 48.75, 29.90, 29.58, 29.54, 29.48, 29.41, 29.26, 28.96, 28.60, 26.84, 26.17. HR-MS (ESI) (m/z): [M + Na]<sup>+</sup> calcd for C<sub>29</sub>H<sub>42</sub>N<sub>4</sub>O<sub>3</sub>, 517.3155, found 517.3147.

## Synthesis of compound 7

To a solution of compound **5** (247 mg, 0.50 mmol) in dry CH<sub>2</sub>Cl<sub>2</sub> was added compound **6** (468 mg, 0.50 mmol) and Cu(CH<sub>3</sub>CN)<sub>4</sub>PF<sub>6</sub> (187 mg, 0.50 mmol). The mixture was stirred at room temperature for 12 h. The solution was extracted with CH<sub>2</sub>Cl<sub>2</sub> (3 × 50 mL), then the organic layer was dried over anhydrous sodium sulfate and concentrated in vacuo to give the crude product, which was purified by column chromatography (SiO<sub>2</sub>, CH<sub>2</sub>Cl<sub>2</sub>/MeOH = 20/1) to afford compound **7** (630 mg, 88%) as a yellowish solid. <sup>1</sup>H NMR (400 MHz, CDCl<sub>3</sub>, 298 K) δ (ppm): 7.64 (d, *J* = 1.2 Hz, 1H), 7.58 (d, *J* = 8.4 Hz, 1H), 7.51 (d, *J* = 8.8 Hz, 1H), 7.41 (d, *J* = 8.4 Hz, 1H), 7.31 (d, *J* = 8.8 Hz, 1H), 7.24 (s, 1H), 7.22 (s, 1H), 7.16-7.21 (m, 6H), 7.13 (d, *J* = 1.6 Hz, 1H), 7.10 (d, *J* = 2.0 Hz, 1H), 7.07 (d, *J* = 1.6 Hz, 1H), 6.96-7.06 (m, 7H), 6.84 (dd, *J* = 8.4 Hz, 1.6 Hz, 1H), 6.76 (d, *J* = 8.8 Hz, 2H), 6.60-6.65 (m, 1H), 6.31-6.36 (m, 2H), 4.20-4.31 (m, 14H), 4.00-4.05 (m, 3H), 3.85 (t, *J* = 13.2 Hz, 2H), 3.72 (s, 8H), 3.63-3.66 (m, 1H), 3.56 (s, 8H), 3.04 (dd, *J* = 11.2 Hz, 2.0 Hz, 1H), 2.87 (s, 2H), 2.15 (s, 2H), 1.81 (s, 2H), 1.65-1.72 (m, 2H), 1.41 (s, 9H), 1.21-1.26 (m, 12H), 0.72 (d, *J* = 6.8 Hz, 3H). <sup>13</sup>C NMR (CDCl<sub>3</sub>, 100 MHz, 298 K) δ (ppm): 158.50, 157.63, 156.11, 148.28, 148.08, 147.64, 138.71, 138.27, 138.10, 137.46, 135.64, 135.57, 135.46, 135.18, 134.05, 132.24, 131.73, 131.20, 130.19, 129.86, 129.46, 129.13, 128.90, 128.60, 128.50, 128.05, 127.83, 127.51, 127.26, 126.55, 126.14, 125.58, 125.21, 125.18, 124.83, 124.57, 124.48, 124.08, 123.60, 123.46, 122.08, 116.74, 116.58, 116.36, 115.43, 115.39, 114.56, 113.25, 113.19, 80.09, 69.22, 69.01, 68.69, 68.50, 68.09, 67.43, 67.26, 49.09, 48.69, 48.38, 37.34, 32.03, 31.88, 31.60, 31.54, 30.36, 30.28, 30.24, 29.87, 29.80, 29.76, 29.53, 29.46, 29.43, 29.37, 29.08, 28.87, 28.57, 26.62, 26.27, 26.13, 22.80, 19.17, 14.24. HR-MS (ESI) (*m/z*): [M + Na]<sup>+</sup> calcd for C<sub>85</sub>H<sub>98</sub>N<sub>4</sub>O<sub>12</sub>S<sub>2</sub>, 1453.6520, found 1453.6511.

## Synthesis of compound *trans*-8

To a solution of compound **7** (286 mg, 0.20 mmol) in dry CH<sub>2</sub>Cl<sub>2</sub> was added TFA (228 mg, 2.00 mmol). The mixture was stirred at room temperature under argon atmosphere for 3 h, and the solvent was removed under reduced pressure. Then to a

solution of the residue in THF was added saturated aqueous solution of  $\text{NH}_4\text{PF}_6$  (10 mL). The solvent was removed under reduced pressure, and the residue was extracted with  $\text{CH}_2\text{Cl}_2$  ( $3 \times 25$  mL) and washed with deionized water. The organic layer was dried over anhydrous sodium sulfate and concentrated in vacuo to afford compound *trans*-**8** (263 mg, 89%) as a yellowish solid without further purification.  $^1\text{H}$  NMR (400 MHz, DMSO, 298 K)  $\delta$  (ppm) : 9.07 (s, 2H), 7.92 (d,  $J = 4.8$  Hz, 2H), 7.75 (d,  $J = 8.8$  Hz, 1H), 7.61 (d,  $J = 8.4$  Hz, 1H), 7.35-7.51 (m, 10H), 7.31 (dd,  $J = 9.6$  Hz, 0.8 Hz, 1H), 7.26 (d,  $J = 2.4$  Hz, 1H), 7.23 (d,  $J = 1.2$  Hz, 1H), 7.17 (dd,  $J = 8.4$  Hz, 1.6 Hz, 1H), 6.93-7.02 (m, 6H), 6.86-6.89 (m, 2H), 6.77-6.81 (m, 1H), 6.50 (t,  $J = 14.8$  Hz, 1H), 6.36 (t,  $J = 7.6$  Hz, 1H), 4.29 (t,  $J = 14.0$  Hz, 2H), 4.17-4.20 (m, 2H), 4.03-4.13 (m, 12H), 3.98-4.02 (m, 1H), 3.92-3.97 (m, 2H), 3.83-3.88 (m, 1H), 3.75-3.79 (m, 8H), 3.68 (d,  $J = 2.4$  Hz, 8H), 3.15 (d,  $J = 12.0$  Hz, 1H), 2.80 (t,  $J = 14.8$  Hz, 2H), 2.04-2.11 (m, 2H), 1.74-1.81 (m, 2H), 1.65-1.71 (m, 2H), 1.23 (s, 12H), 0.65 (d,  $J = 6.8$  Hz, 3H).  $^{13}\text{C}$  NMR (DMSO, 100 MHz, 298 K)  $\delta$  (ppm): 159.22, 157.27, 148.75, 148.47, 148.14, 146.01, 138.35, 136.48, 135.38, 135.29, 134.34, 133.59, 132.52, 131.88, 131.62, 131.39, 131.25, 130.29, 129.95, 129.21, 129.03, 128.73, 128.31, 127.96, 127.62, 126.63, 126.27, 125.71, 125.59, 124.50, 124.47, 124.11, 123.34, 121.91, 121.67, 121.15, 119.25, 114.51, 114.17, 114.02, 113.47, 112.84, 112.32, 70.42, 69.18, 68.91, 68.83, 68.69, 67.52, 67.06, 54.94, 49.81, 49.67, 49.18, 36.17, 31.32, 30.99, 29.70, 29.22, 29.05, 28.88, 28.80, 28.73, 28.61, 28.47, 28.34, 28.13, 25.84, 25.49, 22.12, 21.59, 18.59, 13.98. HR-MS (ESI) ( $m/z$ ):  $[\text{M-PF}_6]^+$  calcd for  $\text{C}_{80}\text{H}_{91}\text{F}_6\text{N}_4\text{O}_{10}\text{PS}_2$  1331.6177, found 1331.6166.

### 1.3 Synthesis of the reference compound *cis*-**8**

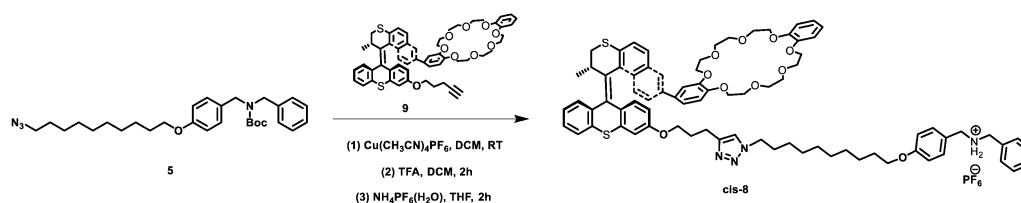

**Scheme S2.** Synthetic route of *cis*-**8**

To a solution of compound **5** (200 mg, 0.40 mmol) in dry  $\text{CH}_2\text{Cl}_2$  was added compound **9** (375 mg, 0.40 mmol) and  $\text{Cu}(\text{CH}_3\text{CN})_4\text{PF}_6$  (150 mg, 0.40 mmol). The

mixture was stirred at room temperature for 12 h. The solution was extracted with CH<sub>2</sub>Cl<sub>2</sub> (3 × 50 mL), then the organic layer was dried over anhydrous sodium sulfate and concentrated in vacuo to give the crude product. The residue was dissolved in dry CH<sub>2</sub>Cl<sub>2</sub> and TFA (456 mg, 4.00 mmol) was added. The mixture was stirred at room temperature under argon atmosphere for 3 h, and the solvent was removed under reduced pressure. Then to a solution of the residue in THF was added saturated aqueous solution of NH<sub>4</sub>PF<sub>6</sub> (10 mL). The solvent was removed under reduced pressure, and the residue was extracted with CH<sub>2</sub>Cl<sub>2</sub> (3 × 25 mL) and washed with deionized water. The organic layer was dried over anhydrous sodium sulfate and concentrated in vacuo to give crude product which was purified by column chromatography (SiO<sub>2</sub>, CH<sub>2</sub>Cl<sub>2</sub>/MeOH = 20/1) to afford compound *cis*-**8** (484 mg, 82%) as a yellowish solid.

<sup>1</sup>H NMR (400 MHz, DMSO, 298K) δ (ppm) : 9.00 (s, 2H), 7.94 (s, 1H), 7.75 (d, *J* = 8.8 Hz, 1H), 7.69 (t, *J* = 7.2 Hz, 2H), 7.53 (d, *J* = 8.8 Hz, 1H), 7.32-7.45 (m, 11H), 7.24 (s, 1H), 7.17 (d, *J* = 7.6 Hz, 1H), 6.92-7.00 (m, 6H), 6.85-6.88 (m, 2H), 7.53 (d, *J* = 8.8 Hz, 1H), 6.24 (d, *J* = 8.4 Hz, 1H), 6.07 (dd, *J* = 8.4 Hz, 2.4 Hz, 1H), 4.17-4.23 (m, 4H), 4.02-4.09 (m, 12H), 3.91-3.96 (m, 2H), 3.84-3.89 (m, 2H), 3.76 (d, *J* = 3.6 Hz, 8H), 3.67 (s, 8H), 3.14 (d, *J* = 11.2 Hz, 1H), 1.63-1.80 (m, 6H), 1.42-1.52 (m, 2H), 1.09-1.20 (m, 12H), 0.65 (d, *J* = 6.4 Hz, 3H). <sup>13</sup>C NMR (DMSO, 100 MHz, 298 K) δ (ppm): 159.01, 156.65, 148.74, 148.46, 148.12, 135.65, 135.42, 135.29, 135.19, 134.74, 134.34, 132.68, 132.52, 131.38, 131.29, 131.18, 130.34, 130.30, 130.11, 129.68, 129.38, 129.05, 128.72, 128.64, 127.91, 127.65, 127.57, 127.53, 127.03, 126.72, 125.74, 124.58, 124.18, 121.13, 119.31, 114.45, 114.21, 114.05, 113.10, 112.41, 111.86, 70.85, 70.40, 70.38, 69.86, 69.15, 68.90, 68.83, 68.69, 67.48, 66.84, 49.09, 36.17, 31.27, 30.97, 29.62, 29.20, 29.18, 29.07, 29.02, 28.96, 28.94, 28.83, 28.75, 28.69, 28.62, 28.59, 28.30, 28.09, 26.54, 25.78, 25.69, 25.45, 25.10, 24.65, 22.08, 21.33, 21.05, 18.63, 13.94. HR-MS (ESI) (m/z): [M-PF<sub>6</sub>]<sup>+</sup> calcd for C<sub>80</sub>H<sub>91</sub>F<sub>6</sub>N<sub>4</sub>O<sub>10</sub>PS<sub>2</sub> 1331.6177, found 1331.6184.

## 2. Structural characterization of *trans*-8

### 2.1 $^1\text{H}$ - $^1\text{H}$ COSY spectrum of *trans*-8 before adding DBU

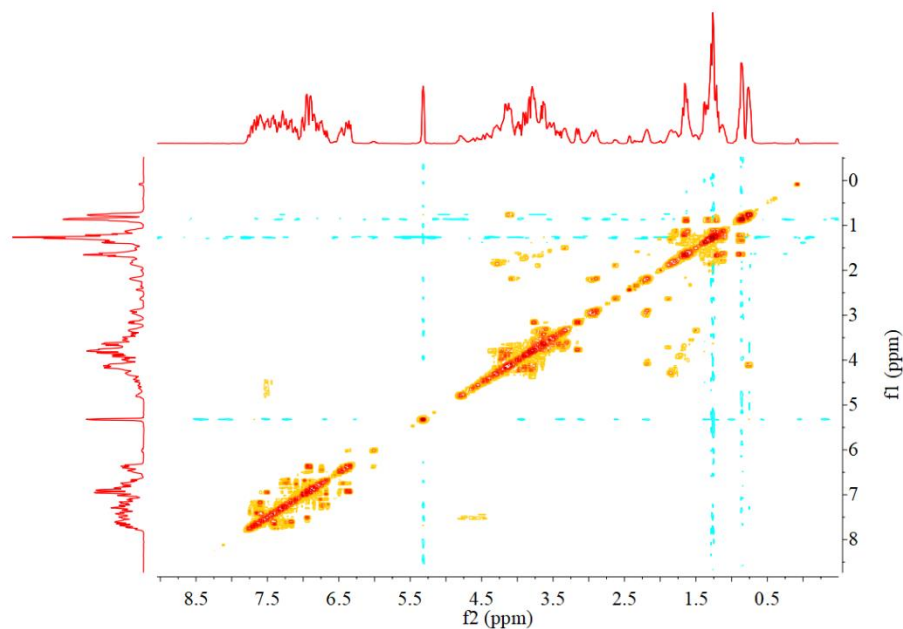

Figure S1  $^1\text{H}$ - $^1\text{H}$  COSY spectrum of *trans*-8 (600 MHz,  $\text{CD}_2\text{Cl}_2$ , 298 K)

### 2.2 $^1\text{H}$ - $^1\text{H}$ COSY spectrum of *trans*-8 after adding DBU

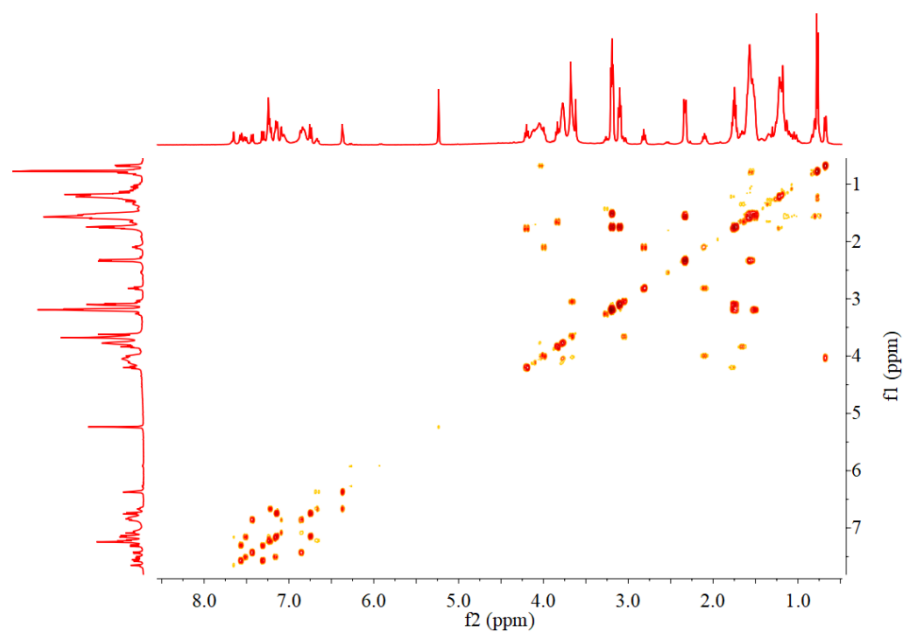

Figure S2.  $^1\text{H}$ - $^1\text{H}$  COSY spectrum of *trans*-8 after adding one equiv DBU (400 MHz,  $\text{CD}_2\text{Cl}_2$ , 298 K)



### 3. Photo- and thermal-isomerization behaviors of *trans*-**8** in dichloromethane- $d_2$

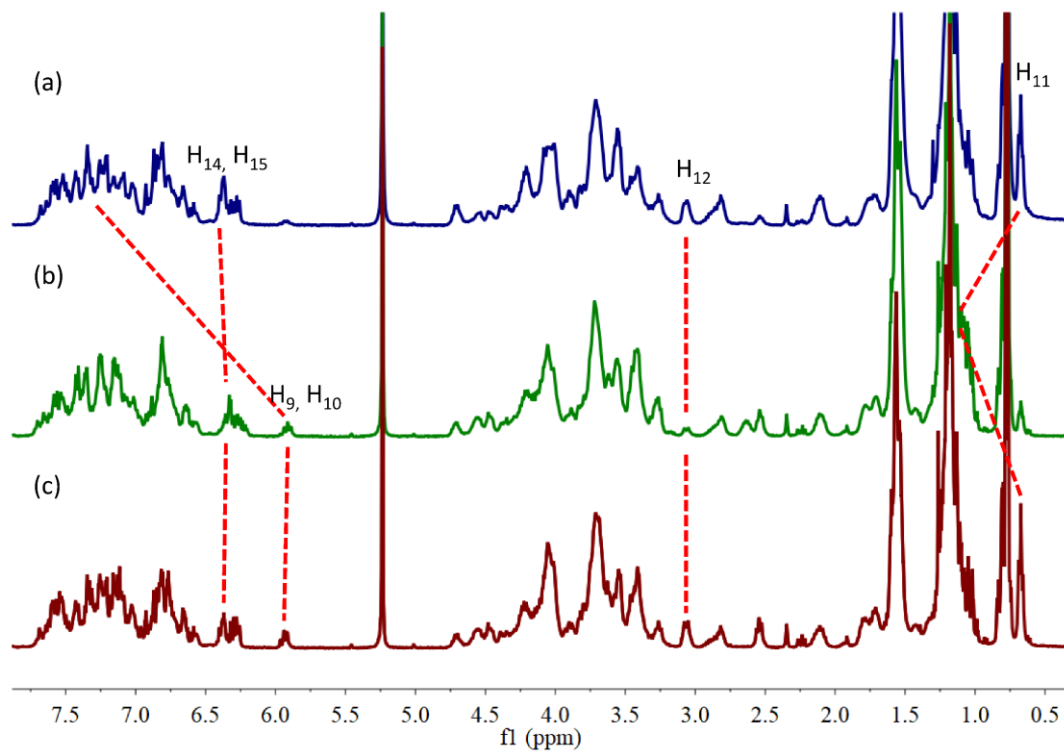

Figure S3.  $^1\text{H}$  NMR spectrum (600 MHz, 20 mM,  $\text{CD}_2\text{Cl}_2$ , 298 K). (a) *trans*-**8** before UV irradiation; (b) *trans*-**8** after UV irradiation (365 nm) for 2 h; (c) *trans*-**8** after UV irradiation (365 nm) for 2 h and then heated  $60^\circ\text{C}$  for 24 h

#### 4. UV-vis absorption spectra and DLS data of *trans*-8

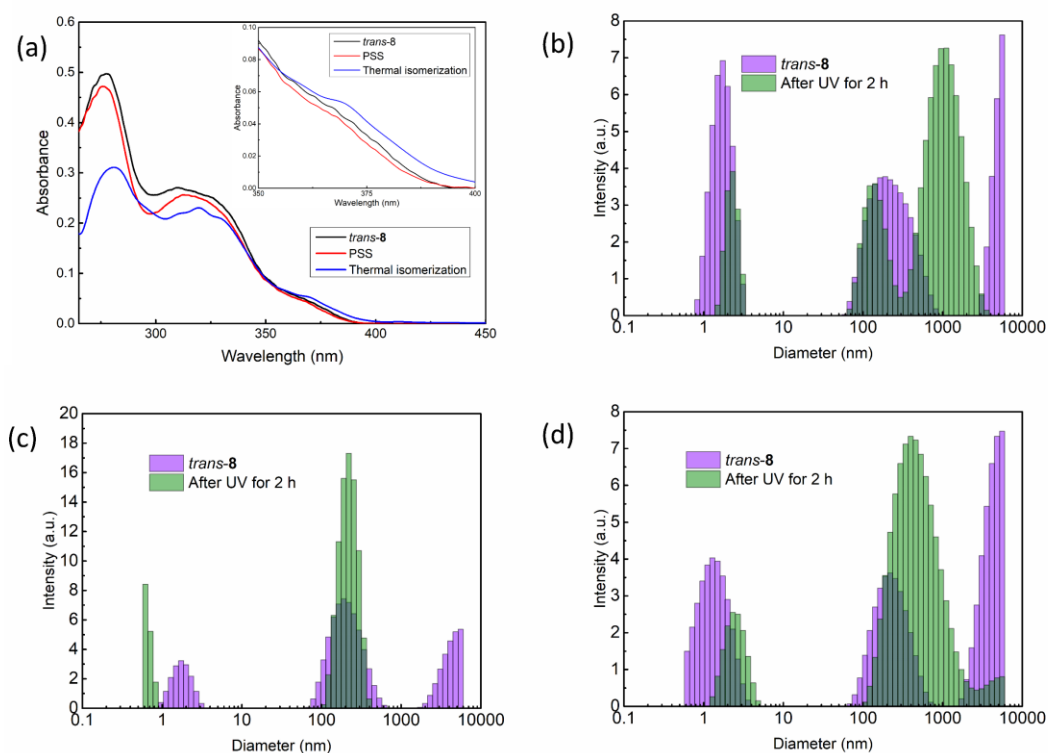

Figure S4. (a) UV-vis absorption spectra (DMSO, 298 K) of *trans*-8 (black line), after UV irradiation (photoisomerization, red line) and heating (thermal isomerization, blue line). DLS data of *trans*-8 and after UV for 2 h in different solvents: (b) THF (1.00 mM); (c) acetone (0.01 mM); (d) DCM (0.01 mM)

**5. SEM images of *trans*-8 before and after UV irradiation in tetrahydrofuran**

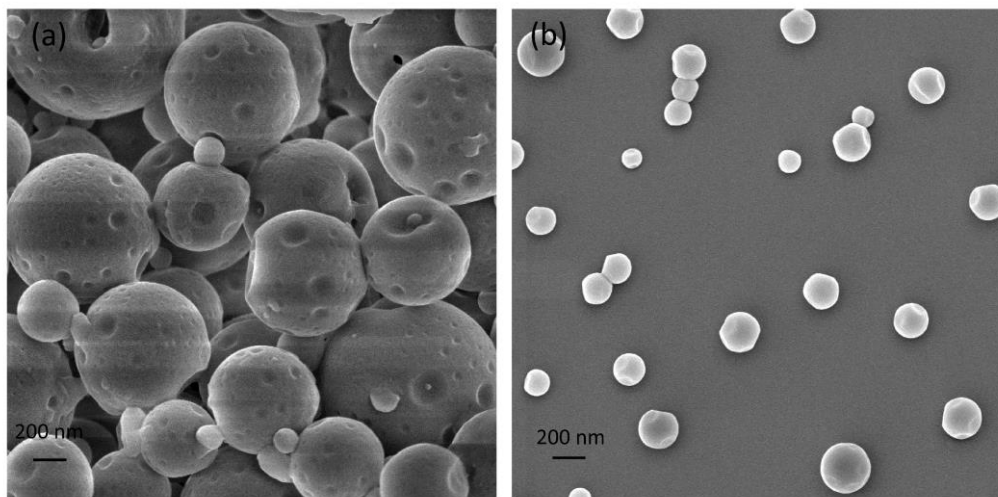

Figure S5. SEM images of *trans*-8 aggregates in THF ( $c = 1 \times 10^{-3}$  M): (a) before UV (365 nm) irradiation; (b) after UV (365 nm) irradiation for 2 h.

**6. TEM images of *trans*-8 before and after UV irradiation in acetone**

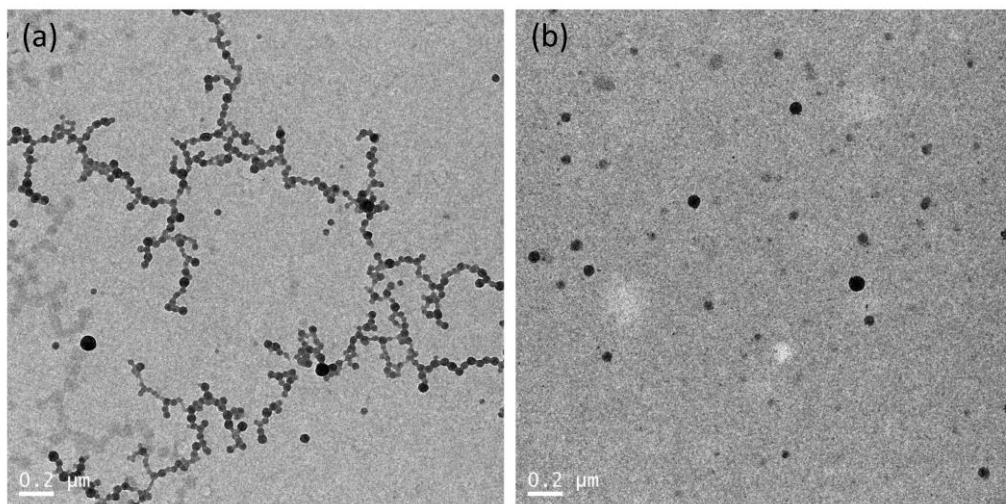

Figure S6. TEM images of *trans*-8 aggregates in acetone ( $c = 1 \times 10^{-5}$  M) : (a) before UV (365 nm) irradiation (b) after UV (365 nm) irradiation for 2 h.

## 7. Solubility of *trans*-8 in different solvents

Table S1. Solubility of *trans*-8 in different solvents

| Solvent                          | Solubility                |
|----------------------------------|---------------------------|
| THF                              | 15 mg mL <sup>-1</sup>    |
| CH <sub>3</sub> OCH <sub>3</sub> | 228 mg mL <sup>-1</sup>   |
| DCM                              | > 510 mg mL <sup>-1</sup> |

## 8. TEM and SEM images of *cis*-8 before and after UV irradiation in tetrahydrofuran

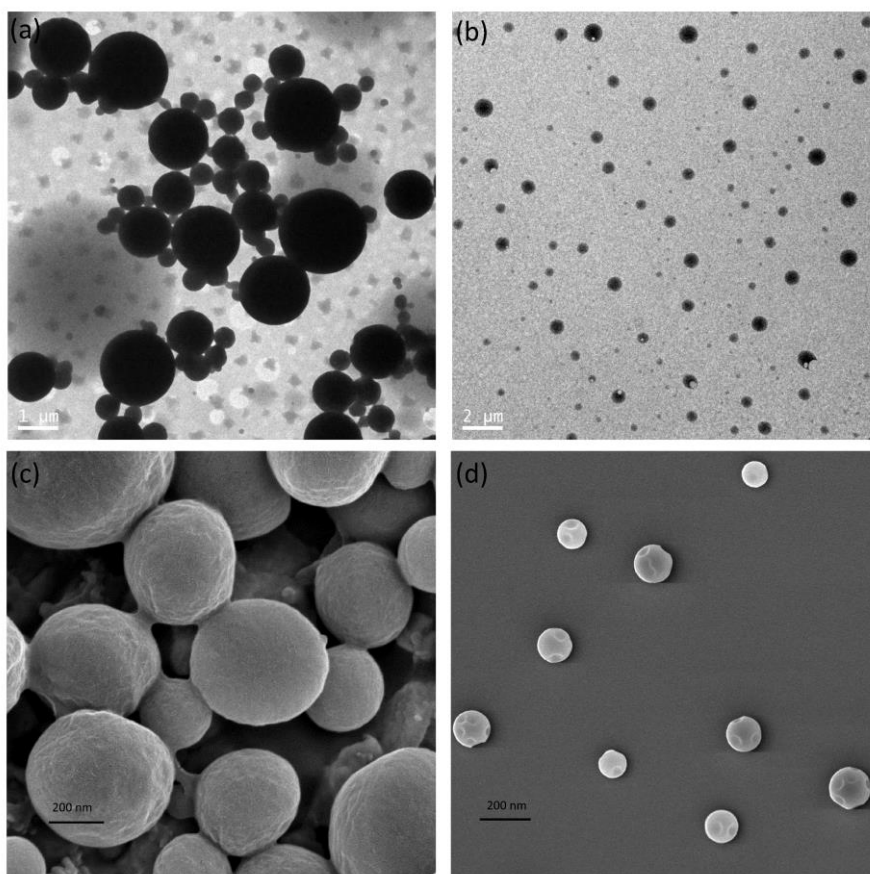

Figure S7. TEM images of *cis*-8 aggregates ( $c = 1 \times 10^{-3}$  M): (a) before UV (365 nm) irradiation; (b) after UV (365 nm) irradiation for 2 h. SEM images of *cis*-8 aggregates ( $c = 1 \times 10^{-3}$  M): (c) before UV (365 nm) irradiation; (d) after UV (365 nm) irradiation for 2 h.

## 9. pH-responsive behavior of *trans*-8

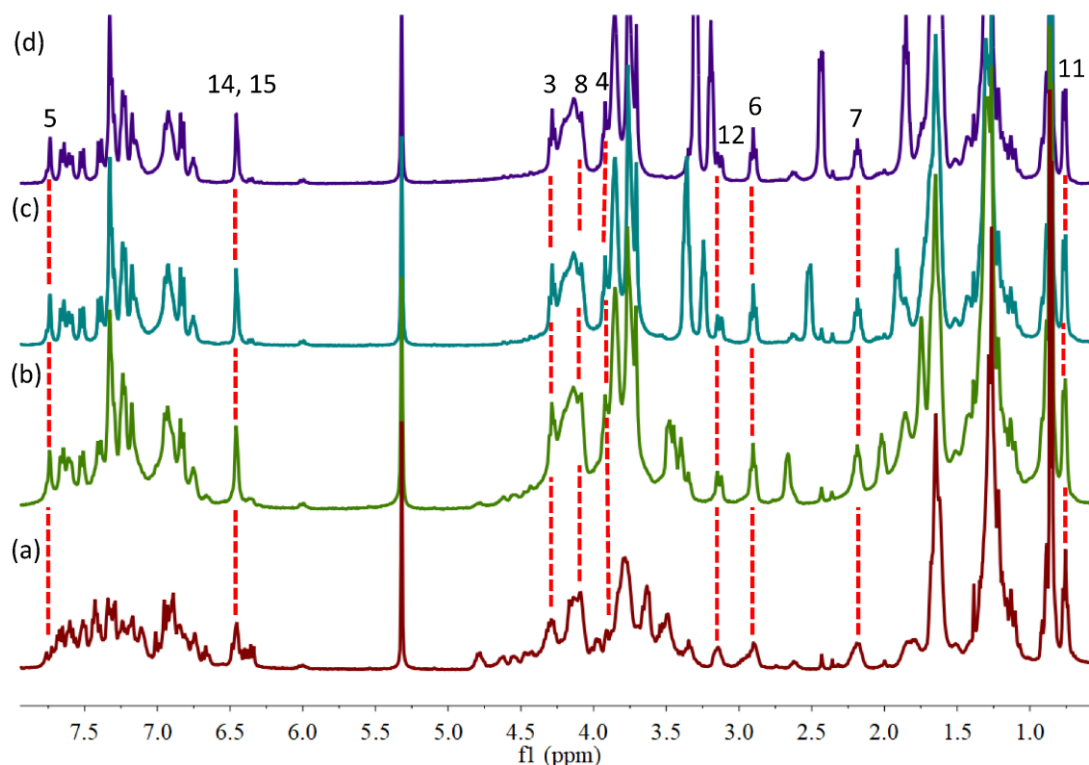

Figure S8.  $^1\text{H}$  NMR spectrum (600 MHz,  $\text{CD}_2\text{Cl}_2$ , 298 K) of 20 mM *trans*-8 upon adding DBU: a) 0 equiv; b) 0.5 equiv; c) 1.0 equiv; d) 1.5 equiv.

## 10. References

- (1) N. Erdeljac, G. Kehr, M. Ahlqvist, L. Knerr, R. Gilmour, *Chem. Commun.*, 2018, **54**, 12002-12005.
- (2) H. Li, Z. X. Zhu, A. C. Fahrenbach, B. M. Savoie, C. F. Ke, J. C. Barnes, J. Y. Lei, Y. L. Zhao, L. M. Lilley, T. J. Marks, M. A. Ratner, J. F. Stoddart, *J. Am. Chem. Soc.*, 2013, **135**, 456-467.
- (3) J. J. Yu, L. Y. Zhao, Z. T. Shi, Q. Zhang, G. London, W. J. Liang, C. Gao, M. M. Li, X. M. Cao, H. Tian, B. L. Feringa, D. H. Qu, *J. Org. Chem.*, 2019, **84**, 5790-5802.

## 11. Appendix

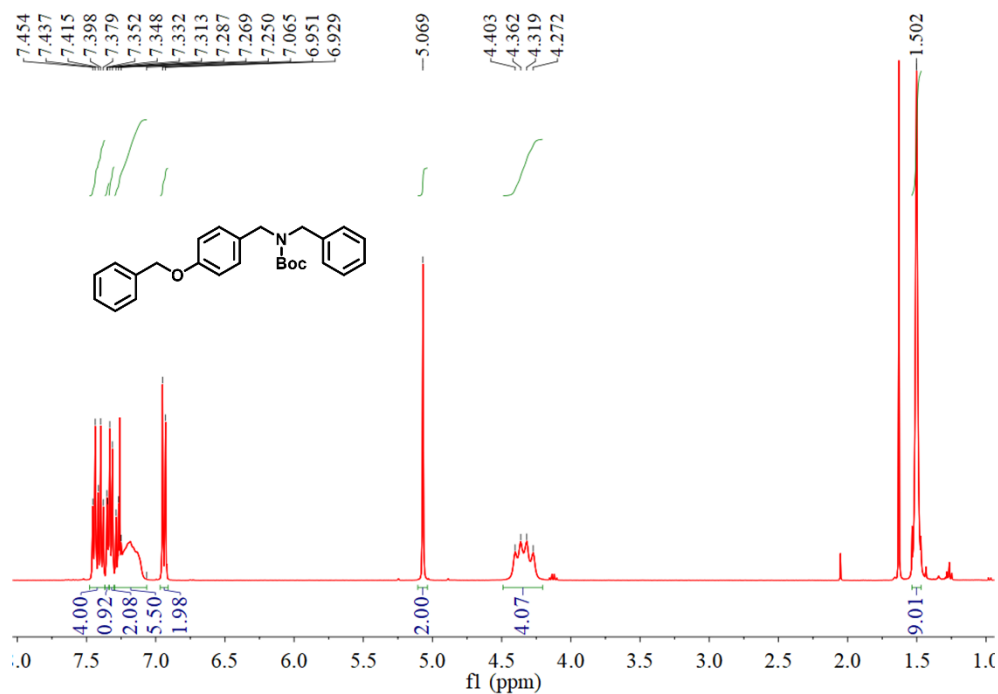

Figure S9. <sup>1</sup>H NMR spectrum (400 MHz, CDCl<sub>3</sub>, 298 K) of compound **2**

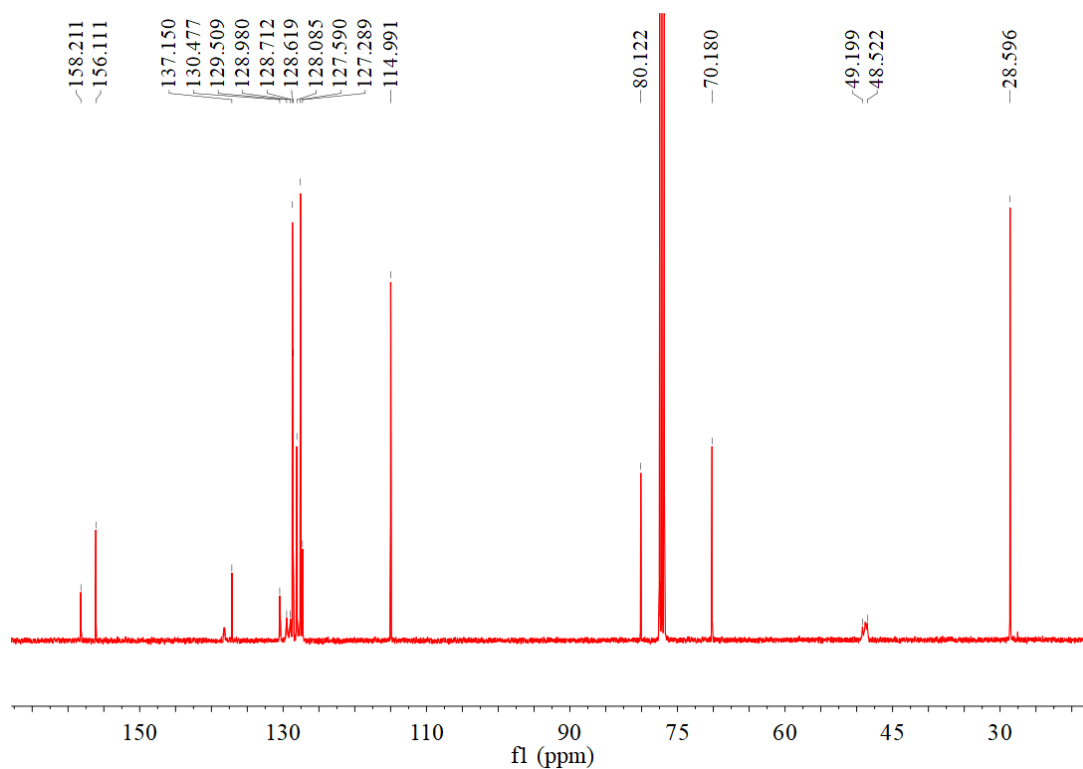

Figure S10. <sup>13</sup>C NMR spectrum (100 MHz, CDCl<sub>3</sub>, 298 K) of compound **2**

# Elemental Composition Report

Page 1

## Single Mass Analysis

Tolerance = 5.0 PPM / DBE: min = -1.5, max = 50.0

Element prediction: Off

Number of isotope peaks used for i-FIT = 2

Monoisotopic Mass, Even Electron Ions

209 formula(e) evaluated with 1 results within limits (up to 50 closest results for each mass)

Elements Used:

C: 25-29 H: 0-99 N: 0-4 O: 1-11 Na: 0-1

QH-QU

QD-ZT-038 38 (0.425) Cm (30:38)

1: TOF MS ES+  
2.65e+004

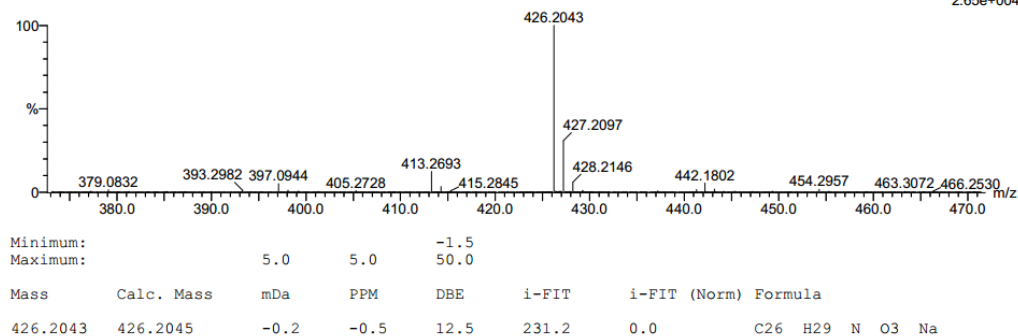

Figure S11. ESI-MS spectrum of compound 2

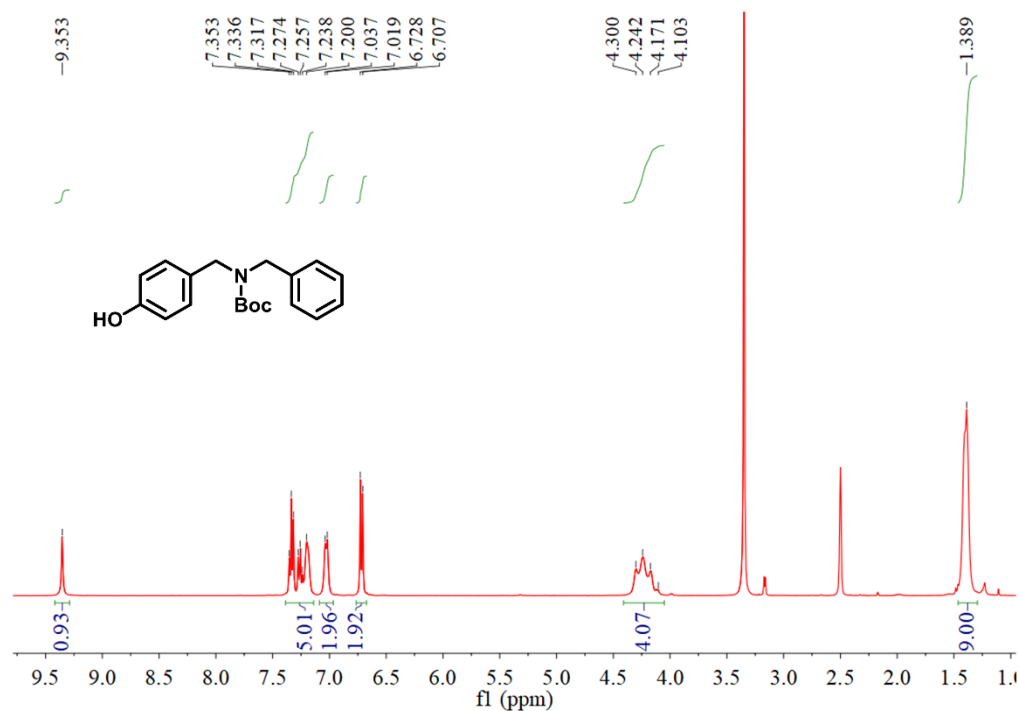

Figure S12. <sup>1</sup>H NMR spectrum (400 MHz, DMSO, 298 K) of compound 3

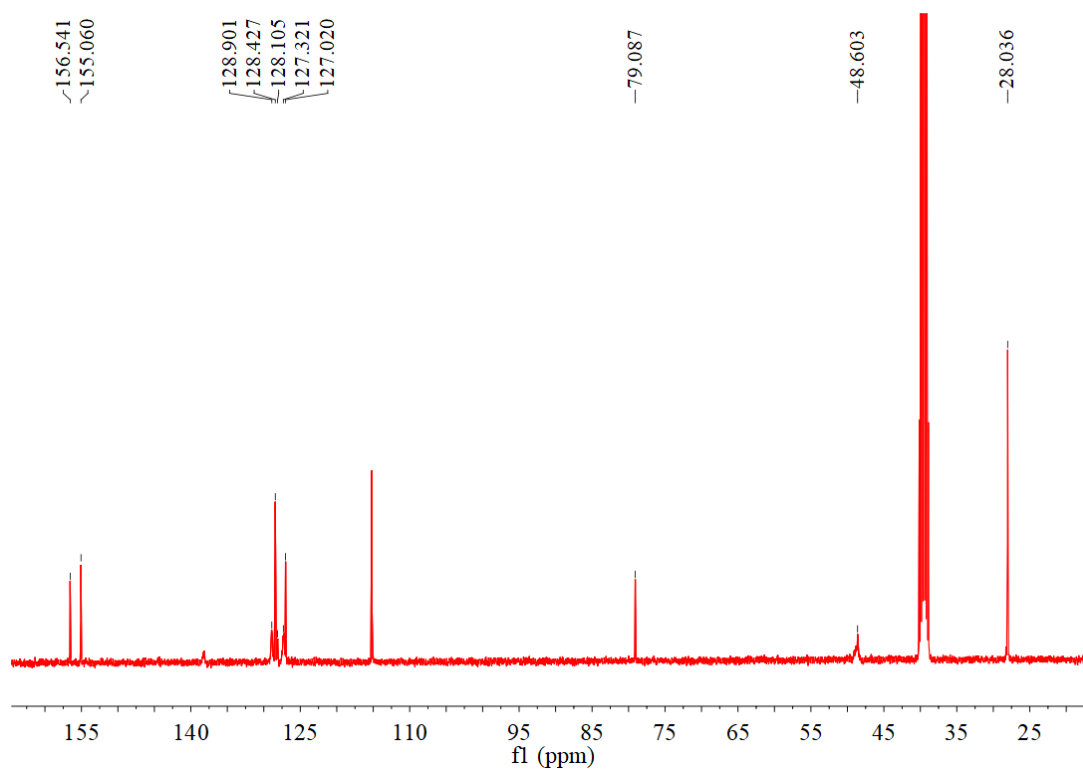

Figure S13.  $^{13}\text{C}$  NMR spectrum (100 MHz, DMSO, 298 K) of compound **3**

#### Elemental Composition Report

Page 1

##### Single Mass Analysis

Tolerance = 5.0 PPM / DBE: min = -1.5, max = 50.0

Element prediction: Off

Number of isotope peaks used for i-FIT = 2

Monoisotopic Mass, Even Electron Ions

187 formula(e) evaluated with 1 results within limits (up to 50 closest results for each mass)

Elements Used:

C: 19-29 H: 0-99 N: 0-4 O: 1-11 Na: 0-1

QH-QU

QD-ZT-039 23 (0.250) Cm (22:23)

1: TOF MS ES+  
1.06e+003

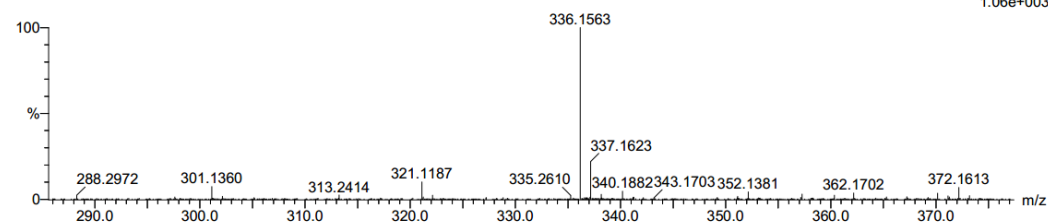

Minimum: -1.5  
Maximum: 50.0

| Mass     | Calc. Mass | mDa  | PPM  | DBE | i-FIT | i-FIT (Norm) | Formula         |
|----------|------------|------|------|-----|-------|--------------|-----------------|
| 336.1563 | 336.1576   | -1.3 | -3.9 | 8.5 | 80.6  | 0.0          | C19 H23 N O3 Na |

Figure S14. ESI-MS spectrum of compound **3**



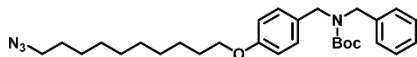

Figure S15.  $^1\text{H}$  NMR spectrum (400 MHz,  $\text{CDCl}_3$ , 298 K) of compound **5**

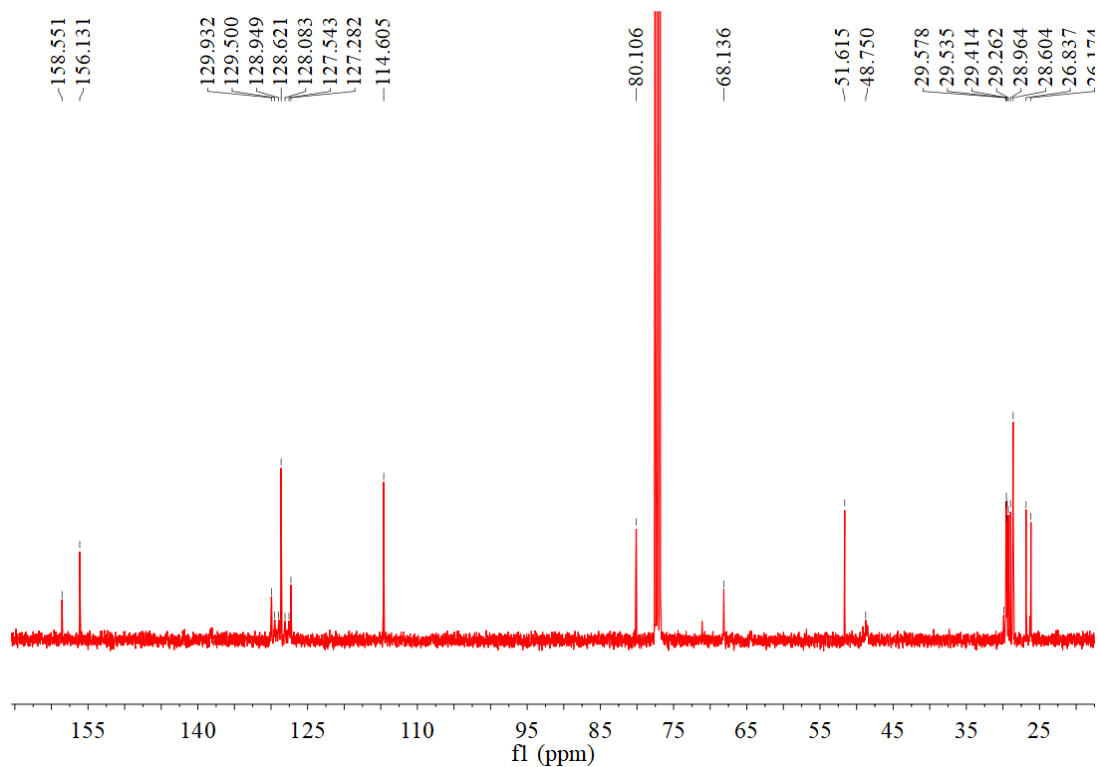

Figure S16.  $^{13}\text{C}$  NMR spectrum (100 MHz,  $\text{CDCl}_3$ , 298 K) of compound **5**

## Single Mass Analysis

Tolerance = 5.0 PPM / DBE: min = -1.5, max = 50.0

Element prediction: Off

Number of isotope peaks used for i-FIT = 2

Monoisotopic Mass, Even Electron Ions

35 formula(e) evaluated with 1 results within limits (up to 50 closest results for each mass)

Elements Used:

C: 0-29 H: 0-42 N: 0-4 O: 0-3 Na: 0-1

DH-QU

QD-ZT-0421 5 (0.036) Cm (4:6)

1: TOF MS ES+  
4.05e+003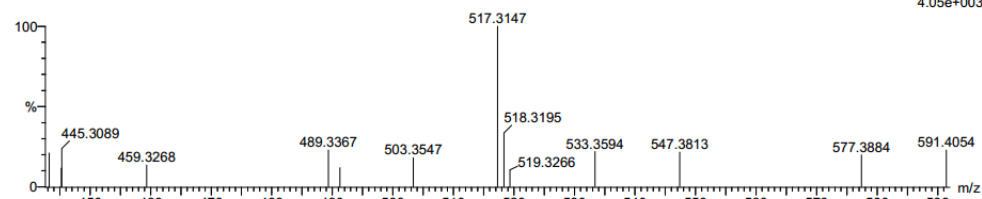Minimum:  
Maximum:5.0 5.0 -1.5  
50.0 50.0

| Mass     | Calc. Mass | mDa  | PPM  | DBE  | i-FIT | i-FIT (Norm) | Formula          |
|----------|------------|------|------|------|-------|--------------|------------------|
| 517.3147 | 517.3155   | -0.8 | -1.5 | 10.5 | 8.8   | 0.0          | C29 H42 N4 O3 Na |

Figure S17. ESI-MS spectrum of compound **5**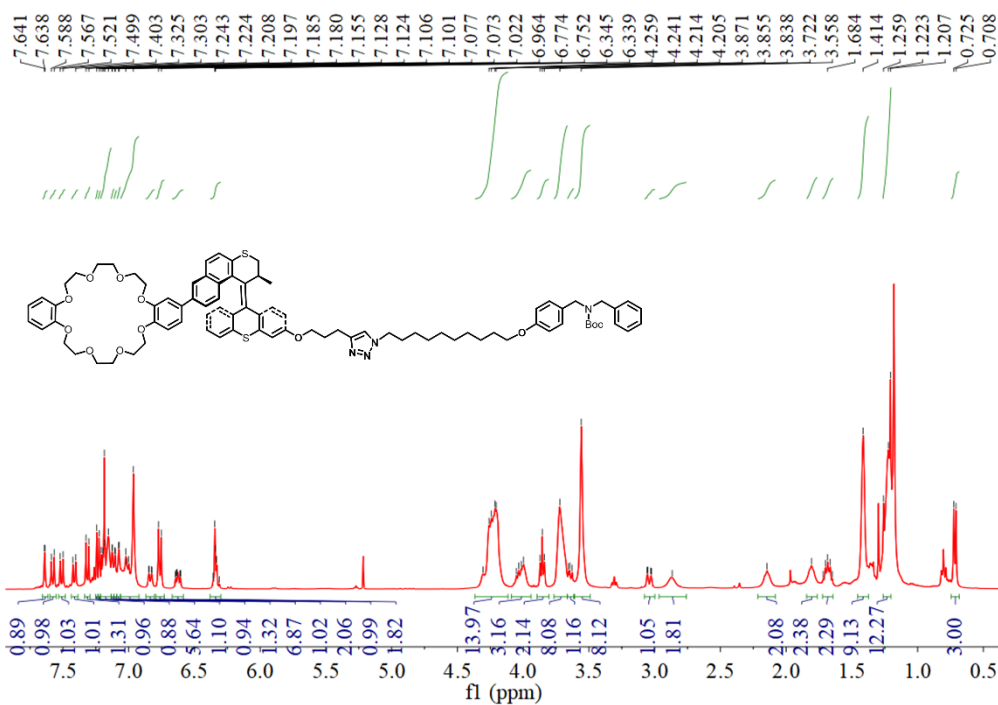Figure S18. <sup>1</sup>H NMR spectrum (400 MHz, CDCl<sub>3</sub>, 298 K) of compound **7**

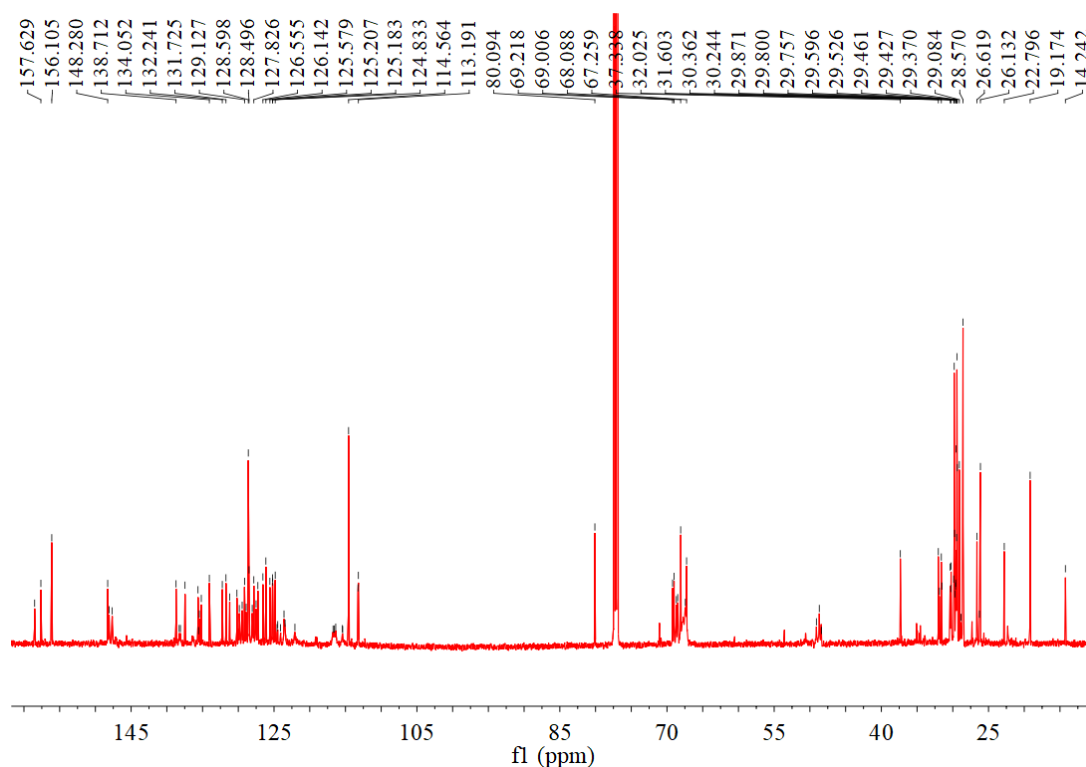

Figure S19.  $^{13}\text{C}$  NMR spectrum (100 MHz,  $\text{CDCl}_3$ , 298 K) of compound **7**

#### Elemental Composition Report

Page 1

##### Single Mass Analysis

Tolerance = 10.0 PPM / DBE: min = -1.5, max = 50.0

Element prediction: Off

Number of isotope peaks used for i-FIT = 2

Monoisotopic Mass, Even Electron Ions

11 formula(e) evaluated with 1 results within limits (up to 50 closest results for each mass)

Elements Used:

C: 85-85 H: 0-100 N: 0-4 O: 12-12 S: 0-2 Na: 0-1

DH-QU

QD-ZT-043 28 (0.305) Cm (25.29)

1: TOF MS ES+  
2.99e+004

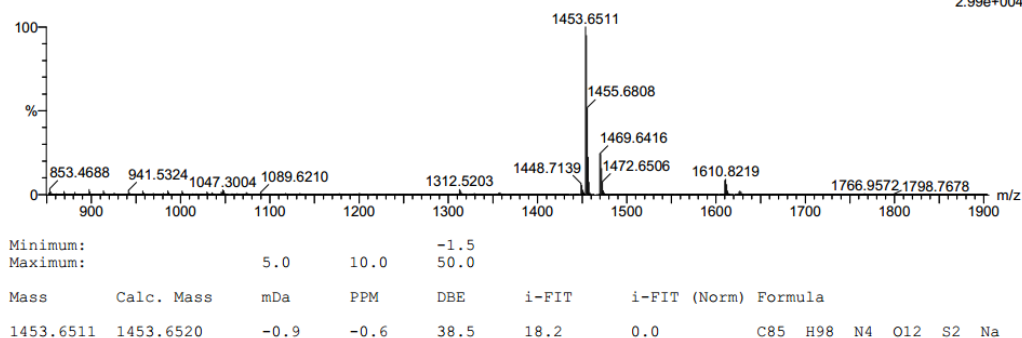

Figure S20. ESI-MS spectrum of compound **7**

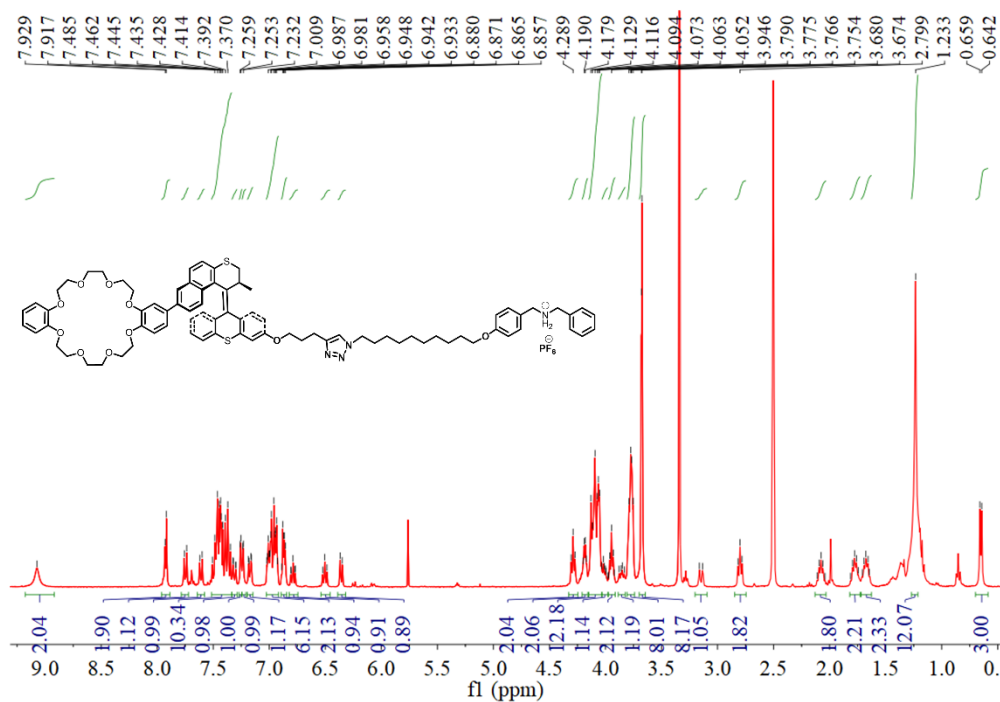

Figure S21. <sup>1</sup>H NMR spectrum (400 MHz, DMSO, 298 K) of *trans*-8

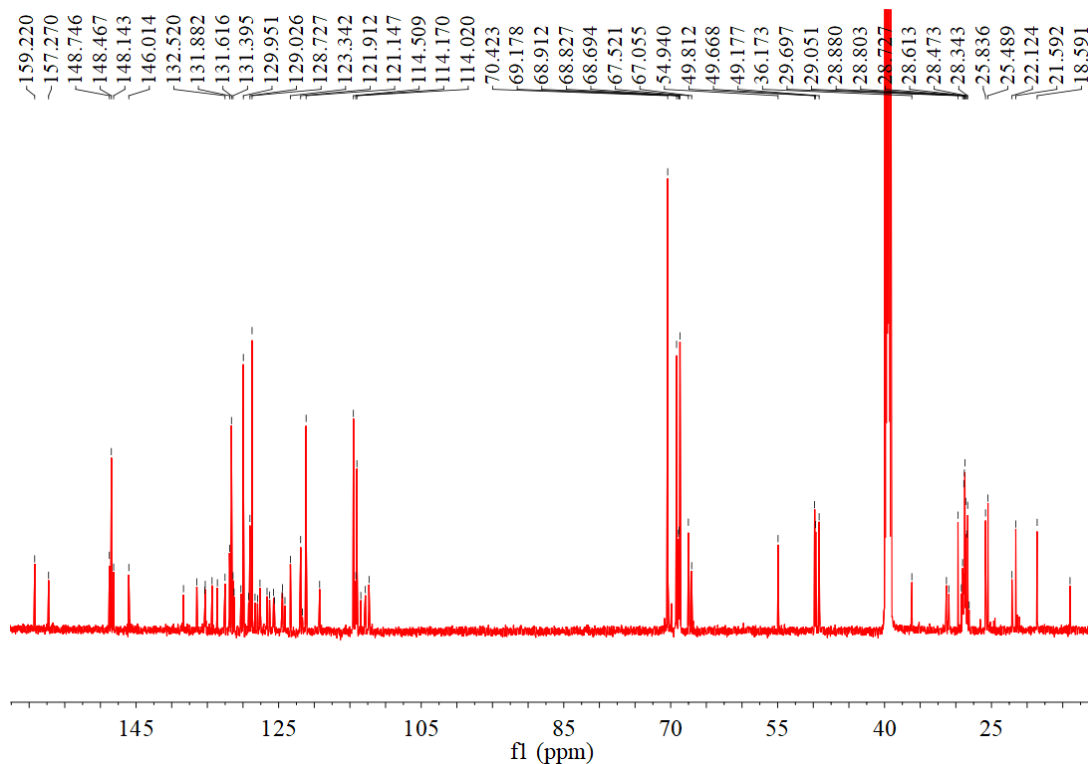

Figure S22. <sup>13</sup>C NMR spectrum (100 MHz, DMSO, 298 K) of *trans*-8

## Single Mass Analysis

Tolerance = 10.0 PPM / DBE: min = -1.5, max = 50.0

Element prediction: Off

Number of isotope peaks used for i-FIT = 2

Monoisotopic Mass, Even Electron Ions

5 formula(e) evaluated with 1 results within limits (up to 50 closest results for each mass)

Elements Used:

C: 80-80 H: 0-100 N: 0-4 O: 10-10 S: 0-2

DH-QU

QD-ZT-044 189 (2.159) Cm (188:189)

1: TOF MS ES+  
1.01e+004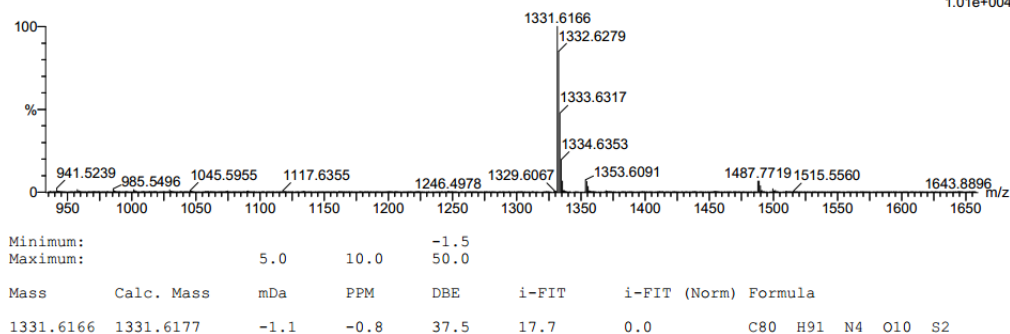Figure S23. ESI-MS spectrum of *trans*-8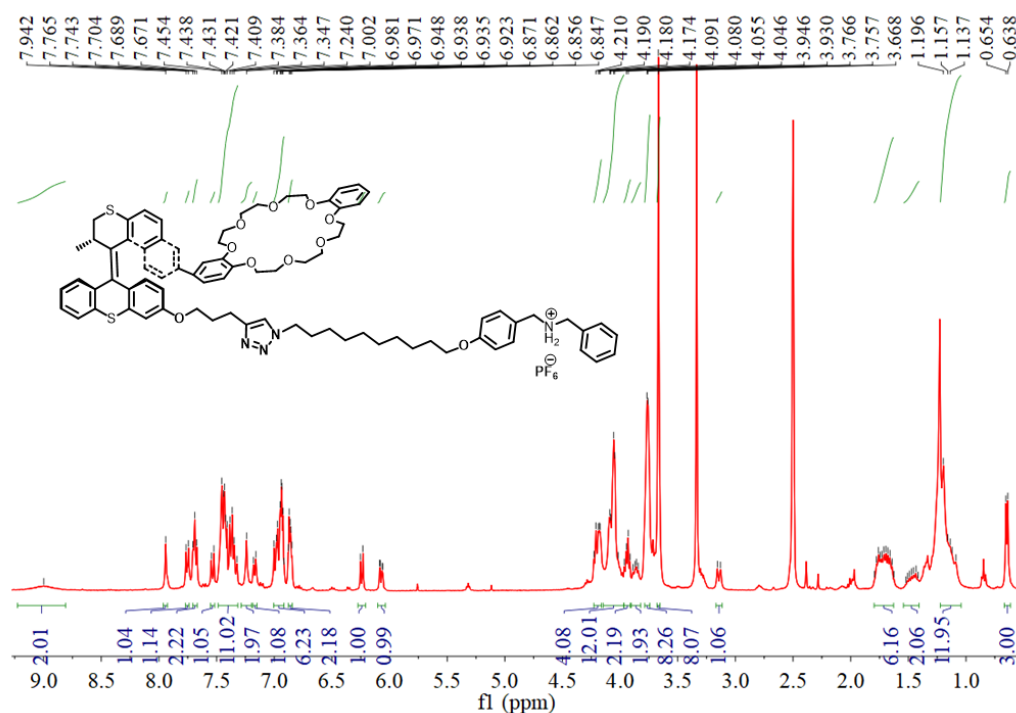Figure S24. <sup>1</sup>H NMR spectrum (400 MHz, DMSO, 298 K) of *cis*-8

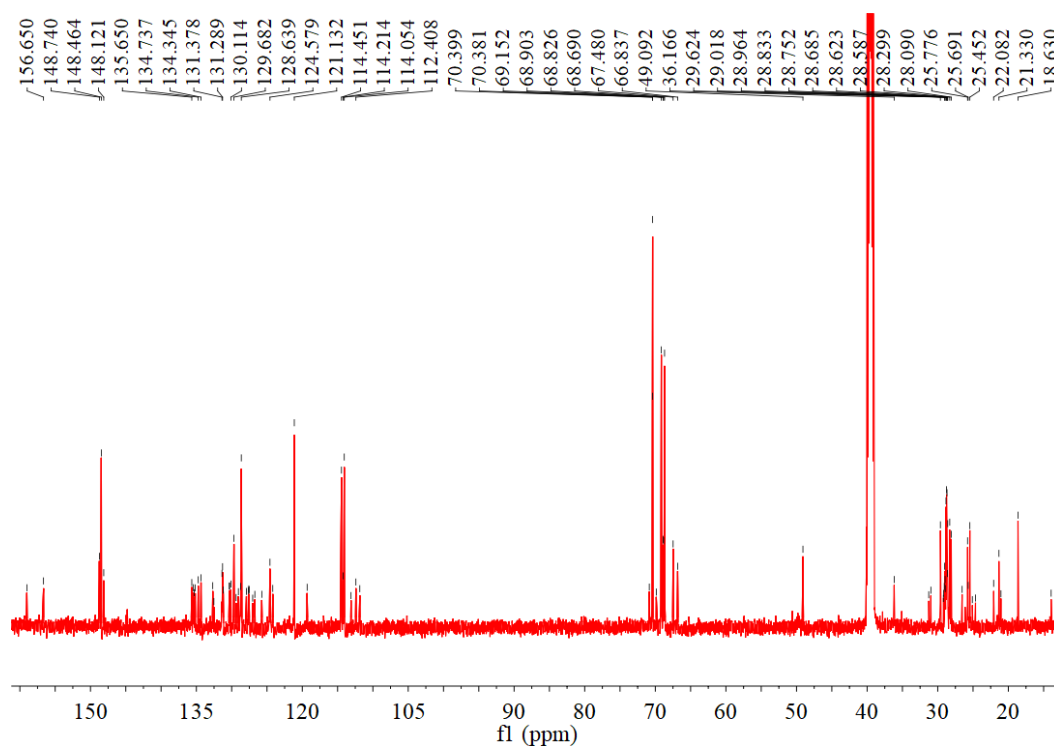

Figure S25.  $^{13}\text{C}$  NMR spectrum (100 MHz, DMSO, 298 K) of *cis*-8

#### Elemental Composition Report

Page 1

##### Single Mass Analysis

Tolerance = 5.0 PPM / DBE: min = -1.5, max = 50.0

Element prediction: Off

Number of isotope peaks used for i-FIT = 2

Monoisotopic Mass, Even Electron Ions

133 formula(e) evaluated with 1 results within limits (up to 50 closest results for each mass)

Elements Used:

C: 0-80 H: 0-92 N: 0-4 O: 0-10 S: 0-2

DH-QU

QD-ZT-070 26 (0.287) Cm (23:28)

1: TOF MS ES+  
4.47e+002

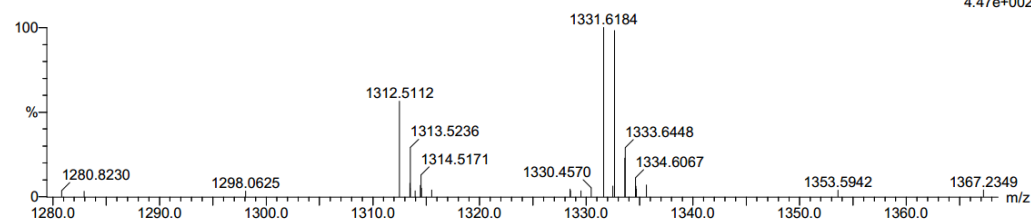

Minimum:

Maximum:

5.0

5.0

-1.5

50.0

Mass

Calc. Mass

mDa

PPM

DBE

i-FIT

i-FIT (Norm)

Formula

1331.6184

1331.6177

0.7

0.5

37.5

20.2

0.0

C80 H91 N4 O10 S2

Figure S26. ESI-MS spectrum of *cis*-8
